# Supplementary material for: Inflammation and Prostate Cancer: Pathological Analysis from Pros-IT CNR 2
Source: Cancers (Basel). 2023 Jan 19;15(3):630. doi: 10.3390/cancers15030630 (PMC9913270; doi:10.3390/cancers15030630)
Supplement: Supplementary file 1 [file cancers-15-00630-s001.zip › cancers-2123536-supplementary.pdf]

# Pros-IT2

|       |      | Prostatic neoplasia |     |     |     |     |     |     |     |             |   | Chronic Inflammation |   |   |                     |   |   |       |   |   |        | Notes |     |    |     |    |  |  |
|-------|------|---------------------|-----|-----|-----|-----|-----|-----|-----|-------------|---|----------------------|---|---|---------------------|---|---|-------|---|---|--------|-------|-----|----|-----|----|--|--|
| N°    | Site | Gleason Score       |     |     |     |     |     |     |     | Grade Group |   |                      |   |   | Anatomical location |   |   | Grade |   |   | Extent |       |     | GD |     | CA |  |  |
|       |      | 3+3                 | 3+4 | 4+3 | 4+4 | 3+5 | 5+3 | 4+5 | 5+4 | 5+5         | 1 | 2                    | 3 | 4 | 5                   | 1 | 2 | 3     | 1 | 2 | 3      |       | Yes | No | Yes | No |  |  |
| 1     |      |                     |     |     |     |     |     |     |     |             |   |                      |   |   |                     |   |   |       |   |   |        |       |     |    |     |    |  |  |
| 2     |      |                     |     |     |     |     |     |     |     |             |   |                      |   |   |                     |   |   |       |   |   |        |       |     |    |     |    |  |  |
| 3     |      |                     |     |     |     |     |     |     |     |             |   |                      |   |   |                     |   |   |       |   |   |        |       |     |    |     |    |  |  |
| 4     |      |                     |     |     |     |     |     |     |     |             |   |                      |   |   |                     |   |   |       |   |   |        |       |     |    |     |    |  |  |
| 5     |      |                     |     |     |     |     |     |     |     |             |   |                      |   |   |                     |   |   |       |   |   |        |       |     |    |     |    |  |  |
| 6     |      |                     |     |     |     |     |     |     |     |             |   |                      |   |   |                     |   |   |       |   |   |        |       |     |    |     |    |  |  |
| 7     |      |                     |     |     |     |     |     |     |     |             |   |                      |   |   |                     |   |   |       |   |   |        |       |     |    |     |    |  |  |
| 8     |      |                     |     |     |     |     |     |     |     |             |   |                      |   |   |                     |   |   |       |   |   |        |       |     |    |     |    |  |  |
| 9     |      |                     |     |     |     |     |     |     |     |             |   |                      |   |   |                     |   |   |       |   |   |        |       |     |    |     |    |  |  |
| 10    |      |                     |     |     |     |     |     |     |     |             |   |                      |   |   |                     |   |   |       |   |   |        |       |     |    |     |    |  |  |
| 11    |      |                     |     |     |     |     |     |     |     |             |   |                      |   |   |                     |   |   |       |   |   |        |       |     |    |     |    |  |  |
| 12    |      |                     |     |     |     |     |     |     |     |             |   |                      |   |   |                     |   |   |       |   |   |        |       |     |    |     |    |  |  |
| 13    |      |                     |     |     |     |     |     |     |     |             |   |                      |   |   |                     |   |   |       |   |   |        |       |     |    |     |    |  |  |
| 14    |      |                     |     |     |     |     |     |     |     |             |   |                      |   |   |                     |   |   |       |   |   |        |       |     |    |     |    |  |  |
| 15    |      |                     |     |     |     |     |     |     |     |             |   |                      |   |   |                     |   |   |       |   |   |        |       |     |    |     |    |  |  |
| 16    |      |                     |     |     |     |     |     |     |     |             |   |                      |   |   |                     |   |   |       |   |   |        |       |     |    |     |    |  |  |
| 17    |      |                     |     |     |     |     |     |     |     |             |   |                      |   |   |                     |   |   |       |   |   |        |       |     |    |     |    |  |  |
| 18    |      |                     |     |     |     |     |     |     |     |             |   |                      |   |   |                     |   |   |       |   |   |        |       |     |    |     |    |  |  |
| 19    |      |                     |     |     |     |     |     |     |     |             |   |                      |   |   |                     |   |   |       |   |   |        |       |     |    |     |    |  |  |
| 20    |      |                     |     |     |     |     |     |     |     |             |   |                      |   |   |                     |   |   |       |   |   |        |       |     |    |     |    |  |  |
| 21    |      |                     |     |     |     |     |     |     |     |             |   |                      |   |   |                     |   |   |       |   |   |        |       |     |    |     |    |  |  |
| 22    |      |                     |     |     |     |     |     |     |     |             |   |                      |   |   |                     |   |   |       |   |   |        |       |     |    |     |    |  |  |
| 23    |      |                     |     |     |     |     |     |     |     |             |   |                      |   |   |                     |   |   |       |   |   |        |       |     |    |     |    |  |  |
| 24    |      |                     |     |     |     |     |     |     |     |             |   |                      |   |   |                     |   |   |       |   |   |        |       |     |    |     |    |  |  |
| TOTAL |      |                     |     |     |     |     |     |     |     |             |   |                      |   |   |                     |   |   |       |   |   |        |       |     |    |     |    |  |  |

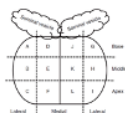

M: Left transition zone

N: Right transition zone

GD: Glandular Disruption CA: Corpora Amilacea

**Figure S1.** biopsy reporting scheme: the presence of PCa and its grading on the left, the presence of PI and its anatomopathological characterization on the right.
